# Supplementary material for: Specific allelic variants of SNPs in the MDM2 and MDMX genes are associated with earlier tumor onset and progression in Caucasian breast cancer patients
Source: PubMed Central journal article supplement (PMC6443004; doi:10.18632/oncotarget.26768), 2019-03-08
Supplement: oncotarget-10-1975-s001.pdf [file oncotarget-10-1975-s001.pdf]

## Specific allelic variants of SNPs in the *MDM2* and *MDMX* genes are associated with earlier tumor onset and progression in Caucasian breast cancer patients

### SUPPLEMENTARY MATERIALS

**Supplementary Table 1: Correlation of *TP53*-mutational status with clinico-pathological parameters**

| variables                              | <i>TP53</i> mutational status | OR            | 95% confidence interval | <i>P</i> *       |
|----------------------------------------|-------------------------------|---------------|-------------------------|------------------|
| age at diagnosis                       | wt                            | 1,000         |                         |                  |
| (< 40 yrs <sup>#</sup> vs. ≥ 40 yrs)   | mt                            | <b>0,268</b>  | <b>0,072–0,996</b>      | <b>0,049</b>     |
| histological subtype                   | wt                            | 1,000         |                         |                  |
| (lobular <sup>#</sup> vs. NST)         | mt                            | <0,001        | -                       | 0,998            |
| tumor size                             | wt                            | 1,000         |                         |                  |
| (T1 <sup>#</sup> vs. T2-T4)            | mt                            | 0,859         | 0,440–1,676             | 0,656            |
| nodal status (N)                       | wt                            | 1,000         |                         |                  |
| (N0 <sup>#</sup> vs. N1-N3)            | mt                            | 0,826         | 0,411–1,672             | 0,599            |
| grading                                | wt                            | 1,000         |                         |                  |
| (G1/2 <sup>#</sup> vs. G3)             | mt                            | <b>3,956</b>  | <b>1,381–7,899</b>      | <b>&lt;0,001</b> |
| ER-status                              | wt                            | 1,000         |                         |                  |
| (ER-pos. <sup>#</sup> vs. ER-neg)      | mt                            | <b>0,147</b>  | <b>0,069–0,314</b>      | <b>&lt;0,001</b> |
| PR-status                              | wt                            | 1,000         |                         |                  |
| (PR-pos. <sup>#</sup> vs. PR-neg)      | mt                            | <b>0,212</b>  | <b>0,105–0,427</b>      | <b>&lt;0,001</b> |
| HER2-status                            | wt                            | 1,000         |                         |                  |
| (HER2-pos. <sup>#</sup> vs. HER2-neg.) | mt                            | <b>2,637</b>  | <b>1,181–5,890</b>      | <b>0,018</b>     |
| lymph vessel invasion                  | wt                            | 1,000         |                         |                  |
| (V0 <sup>#</sup> vs. V1)               | mt                            | 1,336         | 0,670–2,663             | 0,411            |
| Luminal A-like-subtype                 | wt                            | 1,000         |                         |                  |
| (vs. other types)                      | mt                            | <b>0,202</b>  | <b>0,092–0,444</b>      | <b>&lt;0,001</b> |
| Luminal B-like-subtype                 | wt                            | 1,000         |                         |                  |
| (vs. other types)                      | mt                            | 1,082         | 0,534–2,193             | 0,827            |
| HER2-positive (non-luminal) subtype    | wt                            | 1,000         |                         |                  |
| (vs. other types)                      | mt                            | <b>12,000</b> | <b>2,868–50,212</b>     | <b>&lt;0,001</b> |
| triple negative (ductal) subtype       | wt                            | 1,000         |                         |                  |
| (vs. other types)                      | mt                            | <b>0,087</b>  | <b>2,069–11,002</b>     | <b>&lt;0,001</b> |

OR: odds ratio; <sup>#</sup>reference group; \**p*-value from binary-logistic regressions.

**Supplementary Table 2: Correlation of Arg72Pro-allele status with clinicopathological parameters**

| <b>variables</b>                                   | <b>genotype</b> | <b>OR</b>    | <b>95% confidence interval</b> | <b><i>p</i><sup>*</sup></b> |
|----------------------------------------------------|-----------------|--------------|--------------------------------|-----------------------------|
| age at diagnosis                                   | G/G             | 1,000        |                                |                             |
| ( <sup>#</sup> < 40 yrs vs. <sup>#</sup> ≥ 40 yrs) | G/C+C/C         | 0,992        | 0,467–2,109                    | 0,984                       |
| age at diagnosis                                   | G/G             | 1,000        |                                |                             |
| ( <sup>#</sup> < 55 yrs vs. <sup>#</sup> ≥ 55 yrs) | G/C+C/C         | 1,034        | 0,772–1,384                    | 0,823                       |
| primary tumor (T)                                  | G/G             | 1,000        |                                |                             |
| (T1 <sup>#</sup> vs. T2-T4)                        | G/C+C/C         | 1,087        | 0,826–1,43                     | 0,554                       |
| nodal status (N)                                   | G/G             | 1,000        |                                |                             |
| (N0 <sup>#</sup> vs. N+)                           | G/C+C/C         | 1,232        | 0,929–1,634                    | 0,147                       |
| grading                                            | G/G             | 1,000        |                                |                             |
| (G1/2 <sup>#</sup> vs. G3)                         | <b>G/C+C/C</b>  | <b>1,615</b> | <b>1,041–2,505</b>             | <b>0,032</b>                |
| histological subtype                               | G/G             | 1,000        |                                |                             |
| (lobular <sup>#</sup> vs. NST)                     | <b>G/C+C/C</b>  | <b>1,558</b> | <b>1,053–2,304</b>             | <b>0,026</b>                |
| lymph vessel invasion                              | G/G             | 1,000        |                                |                             |
| (V0 <sup>#</sup> vs. V1)                           | G/C+C/C         | 1,023        | 0,752–1,392                    | 0,886                       |
| ER-status                                          | G/G             | 1,000        |                                |                             |
| (ER-pos. <sup>#</sup> vs. ER-neg)                  | G/C+C/C         | 0,955        | 0,653–1,369                    | 0,811                       |
| PR-status                                          | G/G             | 1,000        |                                |                             |
| (PR-pos. <sup>#</sup> vs. PR-neg)                  | G/C+C/C         | 1,049        | 0,778–1,414                    | 0,755                       |
| HER2-status                                        | G/G             | 1,000        |                                |                             |
| (HER2-pos. <sup>#</sup> vs. HER2-neg.)             | G/C+C/C         | 1,265        | 0,849–1,885                    | 0,248                       |

OR: odds ratio; <sup>#</sup>reference group; \**p*-value from binary-logistic regressions.

**Supplementary Table 3: Kaplan-Meier analysis of age-at-diagnosis and event-free survival for TP53 Arg72Pro-SNP**

| Variables                     | Genotype | age-at-diagnosis |                  | event-free survival |       |
|-------------------------------|----------|------------------|------------------|---------------------|-------|
|                               |          | years            | P                | months              | P     |
| <b>all patients</b>           | GG       | 62.8             | 0.051            | 73.3                | 0.356 |
|                               | GC       | 61.2             |                  | 76.1                |       |
|                               | CC       | 63.8             |                  | 73.9                |       |
| <b>TP53 mutations</b>         |          |                  |                  |                     |       |
| wild-type                     | GG       | 66.0             | <b>&lt;0,001</b> | --#                 |       |
|                               | GC       | 59.4             |                  | --                  |       |
|                               | CC       | 61.4             |                  | --                  |       |
| mutated                       | GG       | 60.3             | 0.994            | --#                 |       |
|                               | GC       | 62.0             |                  | --                  |       |
|                               | CC       | 56.5             |                  | --                  |       |
| <b>ER-status</b>              |          |                  |                  |                     |       |
| negative                      | GG       | 63.6             | <b>0.05</b>      | --#                 | --    |
|                               | GC       | 58.7             |                  | --                  |       |
|                               | CC       | 66.5             |                  | --                  |       |
| positive                      | GG       | 62.6             | 0.211            | 74.8                | 0.663 |
|                               | GC       | 61.8             |                  | 77.6                |       |
|                               | CC       | 63.6             |                  | 73.8                |       |
| <b>HER2-status</b>            |          |                  |                  |                     |       |
| negative                      | GG       | 63.2             | 0.112            | 73.5                | 0.516 |
|                               | GC       | 60.0             |                  | 77.0                |       |
|                               | CC       | 66.0             |                  | 73.6                |       |
| positive                      | GG       | 62.7             | 0.145            | --#                 | --    |
|                               | GC       | 61.4             |                  | --                  |       |
|                               | CC       | 63.7             |                  | --                  |       |
| <b>intrinsic subtypes*</b>    |          |                  |                  |                     |       |
| Luminal A-like                | GG       | 61.9             | 0.287            | 76.2                | 0.981 |
|                               | GC       | 61.3             |                  | 79.3                |       |
|                               | CC       | 64.6             |                  | 73.2                |       |
| Luminal B-like                | GG       | 64.2             | 0.098            | --#                 | --#   |
|                               | GC       | 61.7             |                  | --                  |       |
|                               | CC       | 61.9             |                  | --                  |       |
| HER2-positive (non-luminal)   | GG       | 62.1             | <b>0.028</b>     | --#                 | --#   |
|                               | GC       | 60.4             |                  | --                  |       |
|                               | CC       | 48.0             |                  | --                  |       |
| triple negative (ductal)      | GG       | 63.8             | <b>0.048</b>     | --#                 | --#   |
|                               | GC       | 59.9             |                  | --                  |       |
|                               | CC       | 75.0             |                  | --                  |       |
| <b>St. Gallen risk groups</b> |          |                  |                  |                     |       |
| low                           | GG       | 60.4             | 0.123            | 54.5                | 0.134 |
|                               | GC       | 55.6             |                  | 53.7                |       |
|                               | CC       | 63.1             |                  | 53.0                |       |
| intermediate                  | GG       | 63.1             | 0.107            | 49.1                | 0.121 |
|                               | GC       | 61.5             |                  | 51.1                |       |
|                               | CC       | 64.6             |                  | 48.1                |       |
| high                          | GG       | 61.6             | 0.917            | 47.7                | 0.700 |
|                               | GC       | 62.5             |                  | 45.3                |       |
|                               | CC       | 58.2             |                  | 49.2                |       |

#no calculation since all C/C-cases censored.

\*surrogate definitions of intrinsic subtypes determined by immunohistochemistry.

**Supplementary Table 4: Correlation of *MDM2* SNP309-allele status with clinicopathological parameters**

| variables                                    | genotype | OR    | 95% confidence interval | <i>p</i> * |
|----------------------------------------------|----------|-------|-------------------------|------------|
| age at diagnosis                             | T/T      | 1,000 |                         |            |
| ( $< 40$ yrs <sup>#</sup> vs. $\geq 40$ yrs) | T/G+G/G  | 0,953 | 0,448–2,029             | 0,901      |
| age at diagnosis                             | T/T      | 1,000 |                         |            |
| ( $< 55$ yrs <sup>#</sup> vs. $\geq 55$ yrs) | T/G+G/G  | 0,962 | 0,717–1,289             | 0,793      |
| primary tumor (T)                            | T/T      | 1,000 |                         |            |
| (T1 <sup>#</sup> vs. T2-T4)                  | T/G+G/G  | 1,023 | 0,776–1,348             | 0,87       |
| nodal status (N)                             | T/T      | 1,000 |                         |            |
| (N0 <sup>#</sup> vs. N1-N3)                  | T/G+G/G  | 0,889 | 0,669–1,181             | 0,417      |
| grading                                      | T/T      | 1,000 |                         |            |
| (G1/2 <sup>#</sup> vs. G3)                   | T/G+G/G  | 1,079 | 0,7–1,664               | 0,731      |
| histological subtype                         | T/T      | 1,000 |                         |            |
| (lobular <sup>#</sup> vs. NST)               | T/G+G/G  | 0,861 | 0,583–1,273             | 0,453      |
| lymph vessel invasion                        | T/T      | 1,000 |                         |            |
| (V0 <sup>#</sup> vs. V1)                     | T/G+G/G  | 1,052 | 0,772–1,433             | 0,748      |
| ER-status                                    | T/T      | 1,000 |                         |            |
| (ER-pos. vs. ER-neg)                         | T/G+G/G  | 0,769 | 0,526–1,125             | 0,177      |
| PR-status                                    | T/T      | 1,000 |                         |            |
| (PR-pos. <sup>#</sup> vs. PR-neg)            | T/G+G/G  | 0,950 | 0,704–1,283             | 0,74       |
| HER2-status                                  | T/T      | 1,000 |                         |            |
| (HER2-pos. <sup>#</sup> vs. HER2-neg.)       | T/G+G/G  | 0,806 | 0,538–1,206             | 0,294      |

OR: odds ratio; <sup>#</sup>reference group; \**p*-value from binary-logistic regressions.

**Supplementary Table 5: Kaplan-Meier analysis of age-at-diagnosis and event-free survival for MDM2 SNP09**

| Variables                     | Genotype | age-at-diagnosis |              | event-free survival |          |
|-------------------------------|----------|------------------|--------------|---------------------|----------|
|                               |          | years            | <i>P</i>     | months              | <i>P</i> |
| all patients                  | TT       | 61.9             | 0.826        | 75.1                | 0.357    |
|                               | TG       | 62.6             |              | 73.2                |          |
|                               | GG       | 61.6             |              | 72.8                |          |
| <b>TP53 mutations</b>         |          |                  |              |                     |          |
| wild-type                     | TT       | 61.7             | 0.300        | 76.4                | 0.701    |
|                               | TG       | 64.0             |              | 74.5                |          |
|                               | GG       | 59.7             |              | 75.4                |          |
| mutated                       | TT       | 56.9             | 0.126        | -- <sup>#</sup>     |          |
|                               | TG       | 63.6             |              | --                  |          |
|                               | GG       | 67.2             |              | --                  |          |
| <b>ER-status</b>              |          |                  |              |                     |          |
| negative                      | TT       | 61.5             | 0.240        | 62.2                | 0.854    |
|                               | TG       | 62.8             |              | 65.0                |          |
|                               | GG       | 55.5             |              | 63.3                |          |
| positive                      | TT       | 62.1             | 0.953        | 76.9                | 0.523    |
|                               | TG       | 62.5             |              | 74.3                |          |
|                               | GG       | 62.5             |              | 73.7                |          |
| <b>HER2-status</b>            |          |                  |              |                     |          |
| negative                      | TT       | 62.6             | 0.655        | 75.3                | 0.078    |
|                               | TG       | 62.8             |              | 74.1                |          |
|                               | GG       | 61.5             |              | 73.4                |          |
| positive                      | TT       | 57.3             | 0.059        | 70.0                | 0.463    |
|                               | TG       | 61.2             |              | 66.2                |          |
|                               | GG       | 61.9             |              | 64.1                |          |
| <b>intrinsic subtypes*</b>    |          |                  |              |                     |          |
| Luminal A-like                | TT       | 61.5             | 0.899        | 77.9                | 0.074    |
|                               | TG       | 62.3             |              | 74.2                |          |
|                               | GG       | 61.7             |              | 67.6                |          |
| Luminal B-like                | TT       | 62.9             | 0.842        | 73.0                | 0.684    |
|                               | TG       | 62.6             |              | 71.5                |          |
|                               | GG       | 64.3             |              | 70.4                |          |
| HER2-positive (non-luminal)   | TT       | 57.8             | 0.053        | -- <sup>#</sup>     |          |
|                               | TG       | 64.4             |              | --                  |          |
|                               | GG       | 61.2             |              | --                  |          |
| triple negative (ductal)      | TT       | 63.3             | <b>0.013</b> | 58.9                | 0.399    |
|                               | TG       | 63.7             |              | 67.5                |          |
|                               | GG       | 51.9             |              | 58.8                |          |
| <b>St. Gallen risk groups</b> |          |                  |              |                     |          |
| low                           | TT       | 57.8             | 0.952        | 53.1                | 0.759    |
|                               | TG       | 58.9             |              | 53.0                |          |
|                               | GG       | 58.0             |              | 63.0                |          |
| intermediate                  | TT       | 62.1             | 0.916        | 49.5                | 0.920    |
|                               | TG       | 62.8             |              | 49.6                |          |
|                               | GG       | 62.9             |              | 51.3                |          |
| high                          | TT       | 62.8             | 0.164        | 43.5                | 0.129    |
|                               | TG       | 62.5             |              | 49.6                |          |
|                               | GG       | 52.4             |              | 50.4                |          |

<sup>#</sup>all cases censored.

\*surrogate definitions of intrinsic subtypes determined by immunohistochemistry.

**Supplementary Table 6: Correlation of *MDM2* SNP285-allele status with clinicopathological parameters**

| variables                                    | genotype       | OR           | 95% confidence interval | <i>p</i> *   |
|----------------------------------------------|----------------|--------------|-------------------------|--------------|
| age at diagnosis                             | G/G            | 1,000        |                         |              |
| ( $< 55$ yrs <sup>#</sup> vs. $\geq 55$ yrs) | G/C+C/C        | 0,996        | 0,586–1,692             | 0,987        |
| primary tumor (T)                            | G/G            | 1,000        |                         |              |
| (T1 <sup>#</sup> vs. T2-T4)                  | G/C+C/C        | 1,562        | 0,911–2,68              | 0,105        |
| nodal status (N)                             | G/G            | 1,000        |                         |              |
| (N0 <sup>#</sup> vs. N1-N3)                  | G/C+C/C        | 1,513        | 0,855–2,679             | 0,155        |
| grading                                      | <b>G/G</b>     | <b>1,000</b> |                         |              |
| (G1/2 <sup>#</sup> vs. G3)                   | <b>G/C+C/C</b> | <b>1,670</b> | <b>1,014–4,813</b>      | <b>0,044</b> |
| histological subtype                         | G/G            | 1,000        |                         |              |
| (lobular vs. NST)                            | G/C+C/C        | 0,779        | 0,392–1,551             | 0,478        |
| lymph vessel invasion                        | G/G            | 1,000        |                         |              |
| (V0 <sup>#</sup> vs. V1)                     | G/C+C/C        | 1,551        | 0,808–2,979             | 0,187        |
| ER-status                                    | G/G            | 1,000        |                         |              |
| (ER-pos. <sup>#</sup> vs. ER-neg)            | G/C+C/C        | 1,102        | 0,543–2,235             | 0,788        |
| PR-status                                    | G/G            | 1,000        |                         |              |
| (PR-pos. <sup>#</sup> vs. PR-neg)            | G/C+C/C        | 1,260        | 0,725–2,191             | 0,412        |
| HER2-status                                  | G/G            | 1,000        |                         |              |
| (HER2-pos. <sup>#</sup> vs. HER2-neg.)       | G/C+C/C        | 0,905        | 0,433–1,894             | 0,792        |

OR: odds ratio; <sup>#</sup>reference group; \**p*-value from binary-logistic regressions.

**Supplementary Table 7: Kaplan-Meier analysis of age-at-diagnosis and event-free survival for *MDM2* SNP285**

| Variables                             | Genotype | age-at-diagnosis |                  | event-free survival |          |
|---------------------------------------|----------|------------------|------------------|---------------------|----------|
|                                       |          | years            | <i>P</i>         | months              | <i>P</i> |
| <b>all patients</b>                   | GG       | 62.3             | <b>&lt;0.001</b> | 76.6                | 0.542    |
|                                       | GC       | 62.5             |                  | 69.9                |          |
|                                       | CC       | 44.2             |                  | 54.9                |          |
| <b><i>TP53</i> mutations</b>          |          |                  |                  |                     |          |
| wild-type                             | GG       | 62.6             | <b>&lt;0.001</b> | --#                 | --       |
|                                       | GC       | 61.6             |                  | --                  |          |
|                                       | CC       | 43.0             |                  | --                  |          |
| mutated                               | GG       | 62.0             | n.d.*            | --#                 | --       |
|                                       | GC       | 54.3             |                  | --                  |          |
|                                       | CC       | 37.0             |                  | --                  |          |
| <b>ER-status</b>                      |          |                  |                  |                     |          |
| negative                              | GG       | 61.3             | 0.074            | 64.8                | 0.488    |
|                                       | GC       | 65.9             |                  | 58.7                |          |
|                                       | CC       | 45.5             |                  | 42.4                |          |
| positive                              | GG       | 62.4             | <b>&lt;0.001</b> | --#                 | --       |
|                                       | GC       | 62.0             |                  | --                  |          |
|                                       | CC       | 43.0             |                  | --                  |          |
| <b>HER2-status</b>                    |          |                  |                  |                     |          |
| negative                              | GG       | 62.7             | <b>0.004</b>     | 77.1                | 0.241    |
|                                       | GC       | 62.7             |                  | 70.0                |          |
|                                       | CC       | 46.7             |                  | 49.4                |          |
| positive                              | GG       | 59.7             | n.d.*            | --#                 | --#      |
|                                       | GC       | 61.8             |                  | --                  |          |
|                                       | CC       | 37.0             |                  | --                  |          |
| <b>intrinsic subtypes<sup>+</sup></b> |          |                  |                  |                     |          |
| Luminal A-like                        | GG       | 62.0             | <b>0.007</b>     | --#                 | --#      |
|                                       | GC       | 61.1             |                  | --                  |          |
|                                       | CC       | 43.0             |                  | --                  |          |
| Luminal B-like                        | GG       | 63.0             | n.d.*            | --#                 | --#      |
|                                       | GC       | 63.4             |                  | --                  |          |
|                                       | CC       | 43.0             |                  | --                  |          |
| HER2-positive (non-luminal)           | GG       | n.d.*            | n.d.*            | --#                 | --#      |
|                                       | GC       |                  |                  | --                  |          |
|                                       | CC       |                  |                  | --                  |          |
| triple negative (ductal)              | GG       | 62.2             | n.d.*            | --#                 | --#      |
|                                       | GC       | 64.4             |                  | --                  |          |
|                                       | CC       | 54.0             |                  | --                  |          |
| <b>St. Gallen risk groups</b>         |          |                  |                  |                     |          |
| low                                   | GG       | 58.0             | 0.973            | 54.6                | 0.826    |
|                                       | GC       | 62.5             |                  | 37.8                |          |
|                                       | CC       | -                |                  | -                   |          |
| intermediate                          | GG       | 62.7             | <b>&lt;0.001</b> | 49.5                | 0.695    |
|                                       | GC       | 62.0             |                  | 53.8                |          |
|                                       | CC       | 44.3             |                  | 48.3                |          |
| high                                  | GG       | 61.6             | 0.936            | 46.5                | 0.299    |
|                                       | GC       | 66.4             |                  | 51.3                |          |
|                                       | CC       | -                |                  | -                   |          |

#no calculation since all cases censored.

\*n.d. – not determined, too few cases.

+surrogate definitions of intrinsic subtypes determined by immunohistochemistry.

**Supplementary Table 8: Correlation of *MDMX* SNP31826-allele status with clinicopathological parameters**

| variables                                    | genotype     | OR           | 95% confidence interval | <i>p</i> *   |
|----------------------------------------------|--------------|--------------|-------------------------|--------------|
| age at diagnosis                             | G/G oder G/A | 1,000        |                         |              |
| ( $< 40$ yrs <sup>#</sup> vs. $\geq 40$ yrs) | A/A          | <b>2,317</b> | <b>1,168–4,813</b>      | <b>0,017</b> |
| age at diagnosis                             | G/G oder G/A | 1,000        |                         |              |
| ( $< 55$ yrs <sup>#</sup> vs. $\geq 55$ yrs) | A/A          | 1,125        | 0,885–1,43              | 0,337        |
| primary tumor (T)                            | G/G oder G/A | 1,000        |                         |              |
| (T1 <sup>#</sup> vs. T2-T4)                  | A/A          | 1,073        | 0,857–1,1344            | 0,538        |
| nodal status (N)                             | G/G oder G/A | 1,000        |                         |              |
| (N0 <sup>#</sup> vs. N1-N3)                  | A/A          | 1,042        | 0,827–1,312             | 0,727        |
| grading                                      | G/G oder G/A | 1,000        |                         |              |
| (G1/2 <sup>#</sup> vs. G3)                   | A/A          | 0,937        | 0,66–1,33               | 0,716        |
| histological subtype                         | G/G oder G/A | 1,000        |                         |              |
| (lobular <sup>#</sup> vs. NST)               | A/A          | 1,129        | 0,826–1,543             | 0,447        |
| lymph vessel invasion                        | G/G oder G/A | 1,000        |                         |              |
| (V0 <sup>#</sup> vs. V1)                     | <b>A/A</b>   | <b>1,292</b> | <b>1,005–1,66</b>       | <b>0,045</b> |
| ER-status                                    | G/G oder G/A | 1,000        |                         |              |
| (ER-pos. <sup>#</sup> vs. ER-neg)            | A/A          | 1,148        | 0,838–1,571             | 0,391        |
| PR-status                                    | G/G oder G/A | 1,000        |                         |              |
| (PR-pos. <sup>#</sup> vs. PR-neg)            | A/A          | 1,256        | 0,98–1,61               | 0,071        |
| HER2-status                                  | G/G oder G/A | 1,000        |                         |              |
| (HER2-pos. <sup>#</sup> vs. HER2-neg.)       | A/A          | 0,853        | 0,613–1,186             | 0,344        |

OR: odds ratio; <sup>#</sup>reference group; \**p*-value from binary-logistic regressions.



**Supplementary Table 9: Kaplan-Meier analysis of age-at-diagnosis and event-free survival for *MDMX* SNP31826**

| Variables                     | Genotype | age-at-diagnosis |          | event-free survival |          |
|-------------------------------|----------|------------------|----------|---------------------|----------|
|                               |          | years            | <i>P</i> | months              | <i>P</i> |
| <b>all patients</b>           | GG       | 62.6             | 0.284    | 72.3                | 0.801    |
|                               | GA       | 61.5             |          | 76.4                |          |
|                               | AA       | 63.3             |          | 71.4                |          |
| <b><i>TP53</i> mutations</b>  |          |                  |          |                     |          |
| wild-type                     | GG       | 60.9             | 0.734    | 73.7                | 0.858    |
|                               | GA       | 63.1             |          | 78.0                |          |
|                               | AA       | 61.4             |          | 71.9                |          |
| mutated                       | GG       | 58.0             | 0.729    | --#                 |          |
|                               | GA       | 62.3             |          | --                  |          |
|                               | AA       | -                |          | --                  |          |
| <b>ER-status</b>              |          |                  |          |                     |          |
| negative                      | GG       | 60.8             | 0.121    | 63.4                | 0.953    |
|                               | GA       | 62.6             |          | 63.9                |          |
|                               | AA       | 53.2             |          | 58.6                |          |
| positive                      | GG       | 61.6             | 0.179    | 73.8                | 0.527    |
|                               | GA       | 62.6             |          | 77.9                |          |
|                               | AA       | 64.4             |          | 71.3                |          |
| <b>HER2-status</b>            |          |                  |          |                     |          |
| negative                      | GG       | 62.2             | 0.391    | 72.2                | 0.866    |
|                               | GA       | 62.7             |          | 77.3                |          |
|                               | AA       | 63.9             |          | 71.8                |          |
| positive                      | GG       | 57.5             | 0.262    | 69.4                | 0.367    |
|                               | GA       | 61.8             |          | 65.8                |          |
|                               | AA       | 59.8             |          | 64.4                |          |
| <b>intrinsic subtypes*</b>    |          |                  |          |                     |          |
| Luminal A-like                | GG       | 60.4             | 0.085    | 74.3                | 0.723    |
|                               | GA       | 62.5             |          | 79.3                |          |
|                               | AA       | 64.3             |          | 74.6                |          |
| Luminal B-like                | GG       | 63.3             | 0.523    | 70.6                | 0.058    |
|                               | GA       | 62.3             |          | 72.7                |          |
|                               | AA       | 64.7             |          | 62.3                |          |
| HER2-positive (non-luminal)   | GG       | 60.5             | 0.269    | 66.1                | 0.112    |
|                               | GA       | 62.2             |          | 62.8                |          |
|                               | AA       | 51.0             |          | 45.0+               |          |
| triple negative (ductal)      | GG       | 61.7             | 0.171    | --#                 |          |
|                               | GA       | 63.6             |          | --                  |          |
|                               | AA       | 53.6             |          | --                  |          |
| <b>St. Gallen risk groups</b> |          |                  |          |                     |          |
| low                           | GG       | 59.2             | 0.404    | 47.1                | 0.723    |
|                               | GA       | 58.1             |          | 60.4                |          |
|                               | AA       | 53.2             |          | 60.6                |          |
| intermediate                  | GG       | 61.7             | 0.244    | 49.5                | 0.238    |
|                               | GA       | 63.1             |          | 50.6                |          |
|                               | AA       | 63.4             |          | 46.6                |          |
| high                          | GG       | 61.6             | 0.683    | 45.1                | 0.208    |
|                               | GA       | 61.4             |          | 47.0                |          |
|                               | AA       | 66.6             |          | 52.7                |          |

+one case only.

#no calculation since all cases censored.

\*surrogate definitions of intrinsic subtypes determined by immunohistochemistry.

**Supplementary Table 10: Correlation of *MDMX* SNP34091-allele status with clinicopathological parameters**

| variables                                    | genotype | OR           | 95% confidence interval | <i>p</i> *   |
|----------------------------------------------|----------|--------------|-------------------------|--------------|
| age at diagnosis                             | A/A;A/C  | 1,000        |                         |              |
| ( $< 40$ yrs <sup>#</sup> vs. $\geq 40$ yrs) | C/C      | 1,672        | 0,762–3,668             | 0,2          |
| age at diagnosis                             | A/A;A/C  | 1,000        |                         |              |
| ( $< 55$ yrs <sup>#</sup> vs. $\geq 55$ yrs) | C/C      | 0,954        | 0,712–1,277             | 0,751        |
| primary tumor (T)                            | A/A;A/C  | 1,000        |                         |              |
| (T1 <sup>#</sup> vs. T2-T4)                  | C/C      | <b>1,412</b> | <b>1,071–1,86</b>       | <b>0,014</b> |
| nodal status (N)                             | A/A;A/C  | 1,000        |                         |              |
| (N0 <sup>#</sup> vs. N1-N3)                  | C/C      | 1,101        | 0,83–1,46               | 0,503        |
| grading                                      | A/A;A/C  | 1,000        |                         |              |
| (G1/2 <sup>#</sup> vs. G3)                   | C/C      | 0,709        | 0,46–1,092              | 0,119        |
| histological subtype                         | A/A;A/C  | 1,000        |                         |              |
| (lobular <sup>#</sup> vs. NST)               | C/C      | 1,168        | 0,794–1,718             | 0,429        |
| lymph vessel invasion                        | A/A;A/C  | 1,000        |                         |              |
| (V0 <sup>#</sup> vs. V1)                     | C/C      | 0,918        | 0,674–1,25              | 0,589        |
| ER-status $< 60$ yrs.                        | A/A      | 1,000        |                         |              |
| (ER-pos. <sup>#</sup> vs. ER-neg)            | A/C+C/C  | <b>0,546</b> | <b>0,304–0,978</b>      | <b>0,042</b> |
| PR-status                                    | A/A;A/C  | 1,000        |                         |              |
| (PR-pos. <sup>#</sup> vs. PR-neg)            | C/C      | <b>1,452</b> | <b>1,073–1,964</b>      | <b>0,016</b> |
| HER2-status                                  | A/A;A/C  | 1,000        |                         |              |
| (HER2-pos. <sup>#</sup> vs. HER2-neg.)       | C/C      | 0,815        | 0,5461,217              | 0,317        |

OR: odds ratio; <sup>#</sup>reference group; \**p*-value from binary-logistic regressions.

**Supplementary Table 11: Kaplan-Meier analysis of age-at-diagnosis and event-free survival for *MDMX* SNP34091**

| Variables                     | Genotype | age-at-diagnosis |          | event-free survival |          |
|-------------------------------|----------|------------------|----------|---------------------|----------|
|                               |          | years            | <i>P</i> | months              | <i>P</i> |
| <b>all patients</b>           | AA       | 62.2             | 0.222    | 77.1                | 0.219    |
|                               | AC       | 62.2             |          | 73.4                |          |
|                               | CC       | 64.6             |          | 67.3                |          |
| <b><i>TP53</i> mutations</b>  |          |                  |          |                     |          |
| wild-type                     | AA       | 62.7             | 0.809    | 78.3                | 0.766    |
|                               | AC       | 62.3             |          | 74.5                |          |
|                               | CC       | 61.6             |          | 69.1                |          |
| mutated                       | AA       | 60.3             | 0.310    | -- <sup>#</sup>     |          |
|                               | AC       | 64.7             |          | --                  |          |
|                               | CC       | 50.3             |          | --                  |          |
| <b>ER-status</b>              |          |                  |          |                     |          |
| negative                      | AA       | 59.3             | 0.633    | 64.6                | 0.924    |
|                               | AC       | 64.4             |          | 63.9                |          |
|                               | CC       | 61.7             |          | 59.7                |          |
| positive                      | AA       | 62.7             | 0.219    | 78.7                | 0.131    |
|                               | AC       | 61.8             |          | 74.7                |          |
|                               | CC       | 65.1             |          | 68.2                |          |
| <b>HER2-status</b>            |          |                  |          |                     |          |
| negative                      | AA       | 62.7             | 0.245    | 77.6                | 0.268    |
|                               | AC       | 62.1             |          | 74.0                |          |
|                               | CC       | 64.2             |          | 67.8                |          |
| positive                      | AA       | 58.2             | 0.391    | 70.6                | 0.317    |
|                               | AC       | 60.9             |          | 64.8                |          |
|                               | CC       | 71.7             |          | 50.8                |          |
| <b>intrinsic subtypes*</b>    |          |                  |          |                     |          |
| Luminal A-like                | AA       | 61.5             | 0.478    | 80.5                | 0.252    |
|                               | AC       | 61.8             |          | 74.8                |          |
|                               | CC       | 64.2             |          | 73.2                |          |
| Luminal B-like                | AA       | 63.1             | 0.063    | 74.0                | 0.001    |
|                               | AC       | 60.7             |          | 70.6                |          |
|                               | CC       | 67.0             |          | 54.8                |          |
| HER2-positive (non-luminal)   | AA       | 60.6             | 0.701    | 67.8                | --       |
|                               | AC       | 60.4             |          | 59.9                |          |
|                               | CC       | 76.0*            |          | --                  |          |
| triple negative (ductal)      | AA       | 59.4             | 0.726    | 60.5                | 0.805    |
|                               | AC       | 66.6             |          | 63.9                |          |
|                               | CC       | 59.7             |          | 64.8                |          |
| <b>St. Gallen risk groups</b> |          |                  |          |                     |          |
| low                           | AA       | 58.3             | 0.162    | 52.1                | 0.747    |
|                               | AC       | 59.6             |          | 54.1                |          |
|                               | CC       | 51.7             |          | 64.3                |          |
| intermediate                  | AA       | 62.5             | 0.224    | 50.8                | 0.174    |
|                               | AC       | 62.3             |          | 48.4                |          |
|                               | CC       | 64.3             |          | 51.8                |          |
| high                          | AA       | 61.4             | 0.352    | 45.6                | 0.349    |
|                               | AC       | 60.9             |          | 48.1                |          |
|                               | CC       | 71.7             |          | 46.3                |          |

<sup>#</sup>no calculation since all cases censored.

\*surrogate definitions of intrinsic subtypes determined by immunohistochemistry.
